# Supplementary material for: Near-white emission observed in Dy doped AlN
Source: Royal Society of Chemistry journal article supplement (doi:10.1039/c6ra03815h), 2016-01-01
Supplement: c6ra03815h1.pdf [file c6ra03815h1.pdf]

## Supporting Information

### Near-White Emission observed in Dy doped AlN

Wei Wang, Peng Zhang, Xiaobai Wang, Xiang Lei and Hua Yang\*

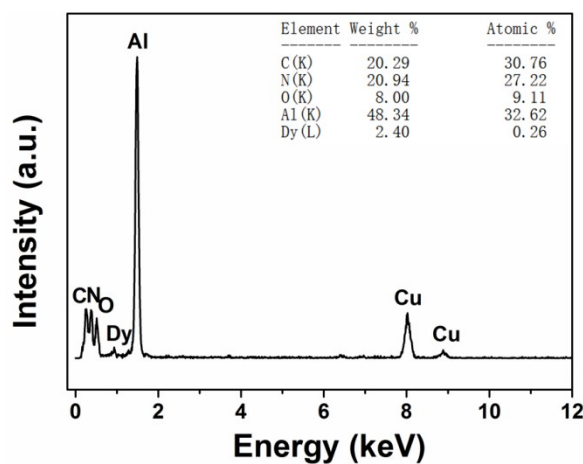

Fig. S1 EDX spectrum of AlN:0.3 mol% Dy sample prepared at 900 °C.

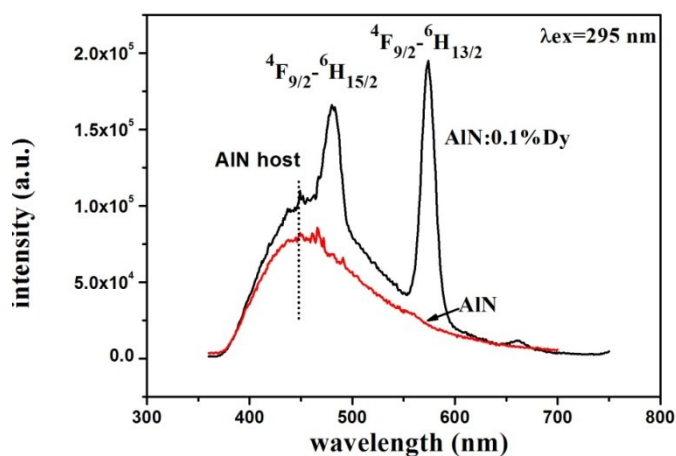

Fig. S2 Photoluminescence emission spectra of (a) undoped AlN and (b) AlN doped with Dy samples.

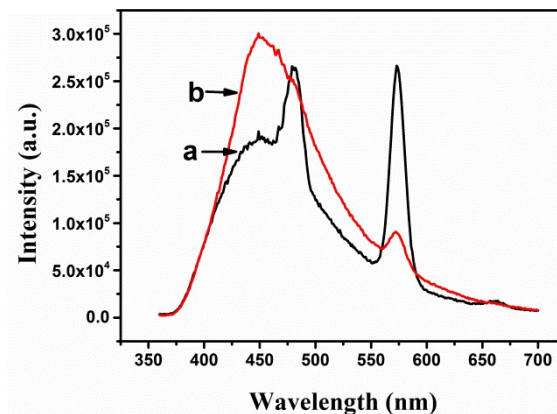

Fig. S3 Photoluminescence emission spectra of AlN:0.3 mol% Dy excited at (a) 294 nm and (b) 350 nm.

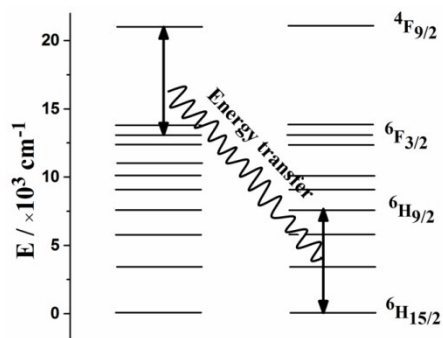

Fig. S4 Diagram of cross relaxation processes between Dy<sup>3+</sup> ions.

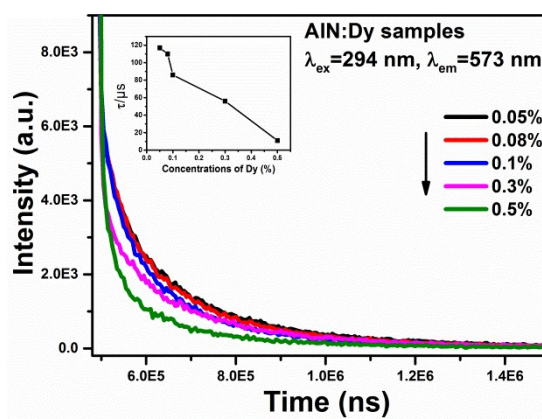

Fig. S5 Photoluminescence decay curves of AlN:Dy samples under excitation at 294 nm.

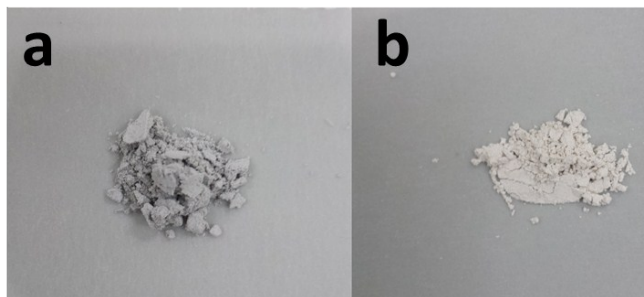

Fig. S6 Digital photographs of AlN:0.1 mol % Dy sample before (a) and after (b) post-thermal treatment.

Table S1 Quantum yields in AlN: Dy samples

| Samples          | Quantum yield ( $\Phi$ ) |
|------------------|--------------------------|
| AlN:0.05 mol% Dy | 0.02                     |
| AlN:0.08 mol% Dy | 0.03                     |
| AlN:0.1 mol% Dy  | 0.03                     |
| AlN:0.3 mol% Dy  | 0.03                     |
| AlN:0.5 mol% Dy  | 0.01                     |
